# Supplementary material for: Phenolic Acids-Rich Fractions from Agaricus bitorguis (Quél.) Sacc. Chaidam ZJU-CDMA-12 Mycelia Modulate Hypoxic Stress on Hypoxia-Damaged PC12 Cells
Source: MDPI journal article supplement (doi:10.3390/molecules25204845), 2020-10-21
Supplement: s1 [file s1]

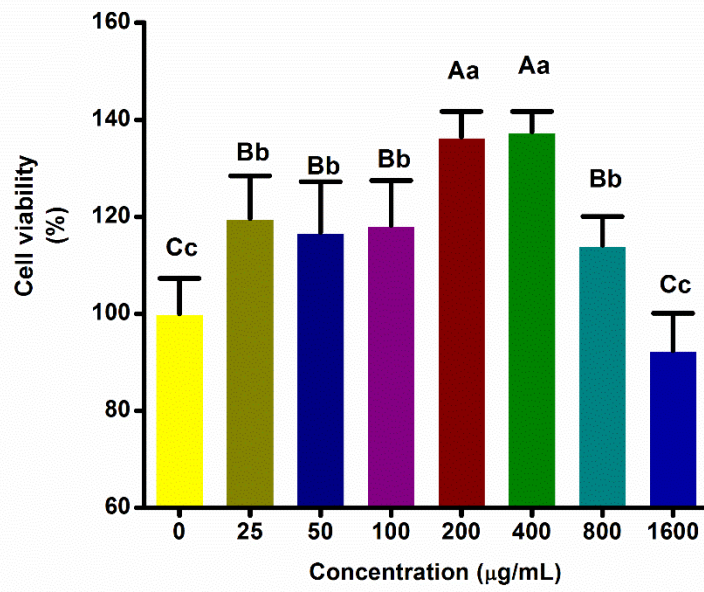

**Fig. S2** The cytotoxicity of IPA on PC12 cells under normoxia.

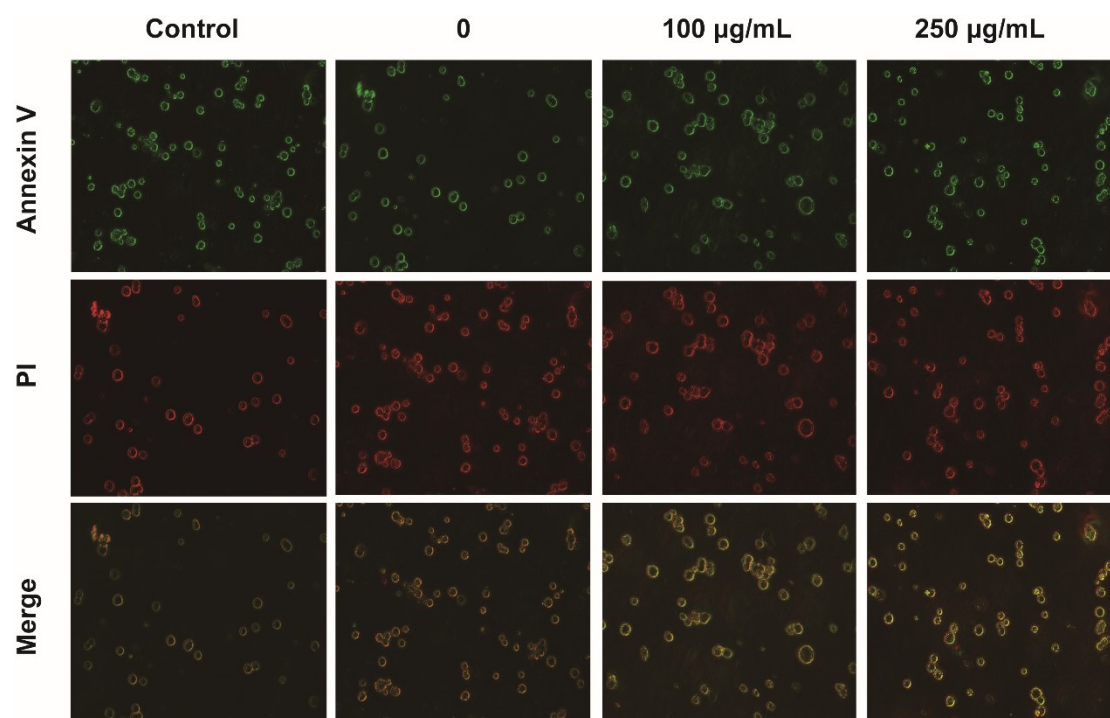

**Fig. S3. Representative images showing the protective effects of IPA on cell apoptosis using Annexin-FITC and Propidium Iodide (PI) staining.**
