# Supplementary material for: Phenolic Acids-Rich Fractions from Agaricus bitorguis (Quél.) Sacc. Chaidam ZJU-CDMA-12 Mycelia Modulate Hypoxic Stress on Hypoxia-Damaged PC12 Cells
Source: MDPI journal article supplement (doi:10.3390/molecules25204845), 2020-10-21
Supplement: s1 [file s1]

## Supplementary files

**Table S1 Data information of base peak chromatogram of IPA**

| <b>Index</b> | <b>Time (min)</b> | <b>Area (%)</b> | <b>Start (min)</b> | <b>End (min)</b> | <b>Width (min)</b> |
|--------------|-------------------|-----------------|--------------------|------------------|--------------------|
| 1            | 0.415             | 6.272           | 0.315              | 0.518            | 0.203              |
| 2            | 0.550             | 0.326           | 0.518              | 0.648            | 0.130              |
| 3            | 0.904             | 0.471           | 0.682              | 0.980            | 0.298              |
| 4            | 1.015             | 0.217           | 0.980              | 1.103            | 0.124              |
| 5            | 1.157             | 0.157           | 1.103              | 1.208            | 0.104              |
| 6            | 1.352             | 0.749           | 1.208              | 1.394            | 0.186              |
| 7            | 1.432             | 0.529           | 1.394              | 1.461            | 0.067              |
| 8            | 1.490             | 1.022           | 1.461              | 1.723            | 0.262              |
| 9            | 1.741             | 0.020           | 1.723              | 1.773            | 0.050              |
| 10           | 1.886             | 0.126           | 1.807              | 1.914            | 0.106              |
| 11           | 2.008             | 0.202           | 1.914              | 2.056            | 0.142              |
| 12           | 2.243             | 0.758           | 2.056              | 2.372            | 0.316              |
| 13           | 2.412             | 0.174           | 2.372              | 2.440            | 0.068              |
| 14           | 2.472             | 0.221           | 2.440              | 2.509            | 0.069              |
| 15           | 2.562             | 0.560           | 2.509              | 2.769            | 0.260              |
| 16           | 2.837             | 0.164           | 2.769              | 2.909            | 0.140              |
| 17           | 3.109             | 0.620           | 2.909              | 3.312            | 0.402              |
| 18           | 3.335             | 0.060           | 3.312              | 3.382            | 0.071              |
| 19           | 3.443             | 0.026           | 3.417              | 3.488            | 0.071              |
| 20           | 3.506             | 0.009           | 3.488              | 3.523            | 0.035              |
| 21           | 3.629             | 0.011           | 3.612              | 3.647            | 0.035              |
| 22           | 3.718             | 0.024           | 3.647              | 3.736            | 0.089              |
| 23           | 3.753             | 0.005           | 3.736              | 3.771            | 0.035              |
| 24           | 3.797             | 0.013           | 3.771              | 3.824            | 0.053              |
| 25           | 3.872             | 0.095           | 3.824              | 3.909            | 0.085              |
| 26           | 3.925             | 0.007           | 3.909              | 3.942            | 0.033              |
| 27           | 4.130             | 0.254           | 4.047              | 4.214            | 0.167              |
| 28           | 4.230             | 0.016           | 4.214              | 4.247            | 0.033              |
| 29           | 4.425             | 0.086           | 4.369              | 4.471            | 0.102              |
| 30           | 4.487             | 0.009           | 4.471              | 4.503            | 0.033              |
| 31           | 4.570             | 0.006           | 4.553              | 4.587            | 0.034              |
| 32           | 4.623             | 0.039           | 4.587              | 4.689            | 0.102              |
| 33           | 4.746             | 0.011           | 4.722              | 4.773            | 0.050              |
| 34           | 4.941             | 1.388           | 4.823              | 5.228            | 0.405              |
| 35           | 5.377             | 0.018           | 5.346              | 5.398            | 0.052              |
| 36           | 5.483             | 0.081           | 5.398              | 5.552            | 0.155              |
| 37           | 5.707             | 0.321           | 5.620              | 5.835            | 0.215              |
| 38           | 5.958             | 0.250           | 5.886              | 6.035            | 0.149              |
| 39           | 6.157             | 0.068           | 6.100              | 6.217            | 0.117              |

---

|    |        |        |        |        |       |
|----|--------|--------|--------|--------|-------|
| 40 | 6.282  | 0.148  | 6.217  | 6.332  | 0.115 |
| 41 | 6.421  | 0.206  | 6.332  | 6.479  | 0.148 |
| 42 | 6.550  | 0.074  | 6.479  | 6.595  | 0.116 |
| 43 | 6.642  | 0.773  | 6.595  | 6.757  | 0.161 |
| 44 | 6.868  | 0.624  | 6.757  | 6.984  | 0.228 |
| 45 | 7.049  | 0.476  | 6.984  | 7.130  | 0.146 |
| 46 | 7.344  | 0.305  | 7.295  | 7.408  | 0.114 |
| 47 | 7.584  | 5.712  | 7.408  | 8.033  | 0.625 |
| 48 | 8.103  | 1.263  | 8.033  | 8.162  | 0.129 |
| 49 | 8.235  | 2.092  | 8.162  | 8.307  | 0.145 |
| 50 | 8.359  | 2.970  | 8.307  | 8.467  | 0.160 |
| 51 | 8.578  | 2.447  | 8.467  | 8.692  | 0.225 |
| 52 | 8.813  | 1.304  | 8.692  | 8.950  | 0.258 |
| 53 | 9.020  | 1.023  | 8.950  | 9.078  | 0.128 |
| 54 | 9.182  | 1.471  | 9.078  | 9.336  | 0.257 |
| 55 | 9.378  | 0.157  | 9.336  | 9.433  | 0.097 |
| 56 | 9.480  | 0.357  | 9.433  | 9.546  | 0.113 |
| 57 | 9.684  | 2.387  | 9.594  | 9.803  | 0.209 |
| 58 | 9.825  | 0.019  | 9.803  | 9.852  | 0.048 |
| 59 | 10.088 | 5.394  | 9.900  | 10.252 | 0.352 |
| 60 | 10.319 | 2.556  | 10.252 | 10.443 | 0.191 |
| 61 | 10.491 | 0.037  | 10.443 | 10.507 | 0.064 |
| 62 | 10.713 | 2.628  | 10.507 | 10.875 | 0.368 |
| 63 | 10.969 | 0.927  | 10.875 | 11.004 | 0.129 |
| 64 | 11.074 | 1.808  | 11.004 | 11.180 | 0.176 |
| 65 | 11.348 | 3.997  | 11.180 | 11.420 | 0.240 |
| 66 | 11.532 | 11.199 | 11.420 | 11.998 | 0.578 |
| 67 | 12.045 | 0.818  | 11.998 | 12.158 | 0.160 |
| 68 | 12.244 | 0.474  | 12.158 | 12.286 | 0.128 |
| 69 | 12.355 | 0.764  | 12.286 | 12.462 | 0.176 |
| 70 | 12.525 | 0.950  | 12.462 | 12.623 | 0.161 |
| 71 | 12.669 | 0.101  | 12.623 | 12.720 | 0.097 |
| 72 | 12.896 | 1.784  | 12.720 | 13.137 | 0.417 |
| 73 | 13.194 | 0.027  | 13.169 | 13.218 | 0.048 |
| 74 | 13.477 | 0.732  | 13.362 | 13.683 | 0.321 |
| 75 | 13.735 | 0.203  | 13.683 | 13.797 | 0.113 |
| 76 | 14.065 | 1.897  | 13.829 | 14.231 | 0.402 |
| 77 | 14.295 | 0.572  | 14.231 | 14.359 | 0.128 |
| 78 | 14.392 | 0.346  | 14.359 | 14.423 | 0.064 |
| 79 | 14.462 | 0.614  | 14.423 | 14.584 | 0.160 |
| 80 | 14.642 | 0.248  | 14.584 | 14.680 | 0.097 |
| 81 | 14.731 | 0.282  | 14.680 | 14.825 | 0.145 |
| 82 | 14.920 | 2.182  | 14.825 | 15.118 | 0.292 |
| 83 | 15.201 | 1.099  | 15.118 | 15.326 | 0.208 |

---

---

|     |        |       |        |        |       |
|-----|--------|-------|--------|--------|-------|
| 84  | 15.554 | 0.206 | 15.488 | 15.618 | 0.130 |
| 85  | 15.830 | 0.041 | 15.798 | 15.879 | 0.082 |
| 86  | 16.083 | 6.989 | 15.944 | 16.431 | 0.487 |
| 87  | 16.509 | 0.129 | 16.431 | 16.579 | 0.147 |
| 88  | 16.953 | 0.056 | 16.904 | 17.002 | 0.097 |
| 89  | 17.082 | 0.028 | 17.034 | 17.099 | 0.065 |
| 90  | 17.186 | 1.569 | 17.099 | 17.308 | 0.209 |
| 91  | 17.435 | 2.040 | 17.308 | 17.629 | 0.321 |
| 92  | 18.089 | 0.044 | 18.052 | 18.117 | 0.065 |
| 93  | 18.923 | 0.391 | 18.804 | 19.066 | 0.262 |
| 94  | 20.690 | 1.324 | 20.558 | 20.890 | 0.331 |
| 95  | 21.211 | 0.681 | 21.102 | 21.360 | 0.258 |
| 96  | 21.856 | 0.141 | 21.790 | 21.968 | 0.178 |
| 97  | 23.751 | 1.370 | 23.604 | 23.799 | 0.195 |
| 98  | 23.860 | 1.081 | 23.799 | 23.934 | 0.135 |
| 99  | 24.030 | 1.607 | 23.934 | 24.210 | 0.276 |
| 100 | 24.252 | 0.283 | 24.210 | 24.297 | 0.087 |
| 101 | 24.366 | 0.782 | 24.297 | 24.785 | 0.488 |

---
