# Supplementary material for: Phenolic Acids-Rich Fractions from Agaricus bitorguis (Quél.) Sacc. Chaidam ZJU-CDMA-12 Mycelia Modulate Hypoxic Stress on Hypoxia-Damaged PC12 Cells
Source: MDPI journal article supplement (doi:10.3390/molecules25204845), 2020-10-21
Supplement: s1 [file s1]

A

Spectrum from JST-NEG.wiff (sample 1) - Sample003, Experiment 1, -TOF MS (100 - 2000) from 6.629 min

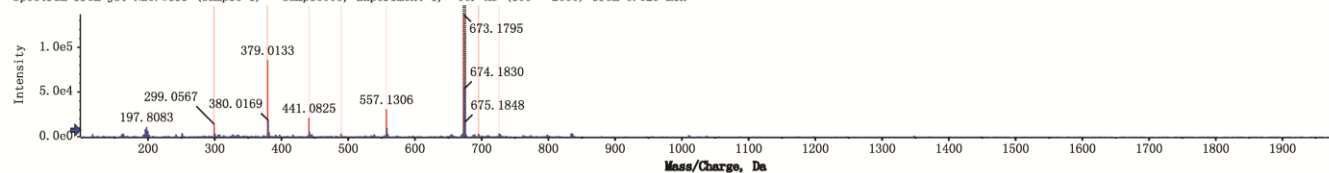

Spectrum from JST-NEG.wiff (sample 1) - Sample003, Experiment 7, -TOF MS<sup>2</sup> (50 - 2000) from 6.637 min  
Precursor: 673.2 Da

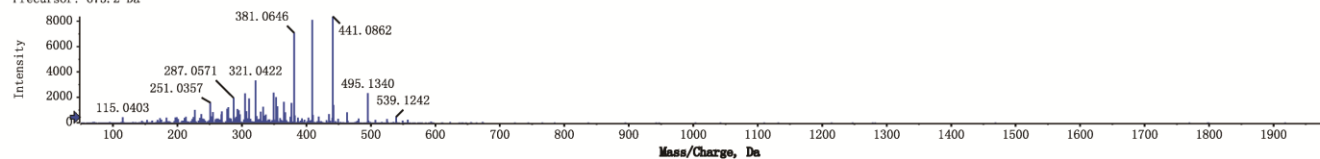

XIC from JST-NEG.wiff (sample 1) - Sample003, Experiment 1, -TOF MS (100 - 2000): 674.2124 Da

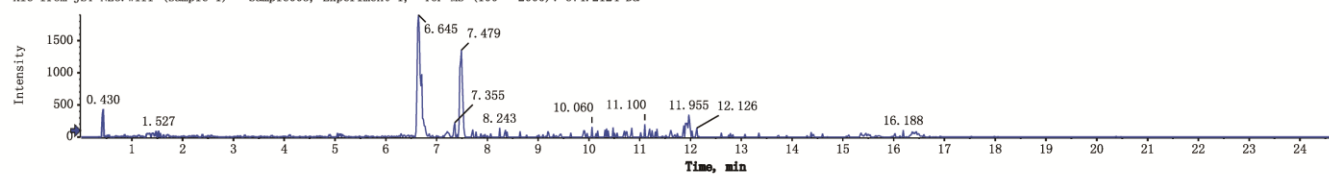

**B**

Spectrum from JST-NEG.wiff (sample 1) - Sample004, Experiment 1, -TOF MS (100 - 2000) from 6.637 min

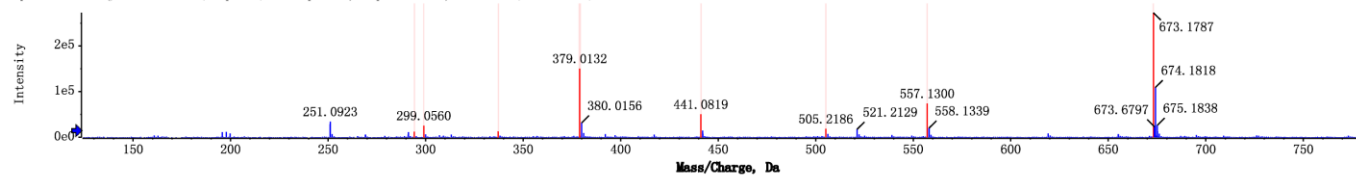

Spectrum from JST-NEG.wiff (sample 1) - Sample004, Experiment 6, -TOF MS<sup>2</sup> (50 - 2000) from 6.644 min  
Precursor: 441.1 Da

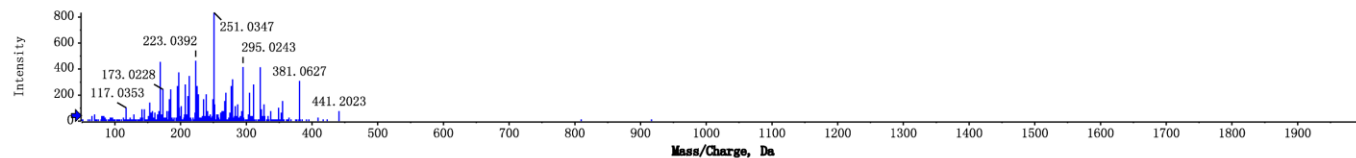

XIC from JST-NEG.wiff (sample 1) - Sample004, Experiment 1, -TOF MS (100 - 2000): 442.0914 Da

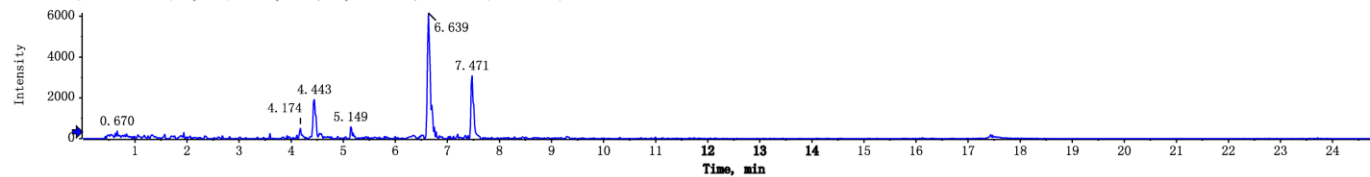

C

Spectrum from JST-NEG.wiff (sample 1) - Sample003, Experiment 1, -TOF MS (100 - 2000) from 8.827 min

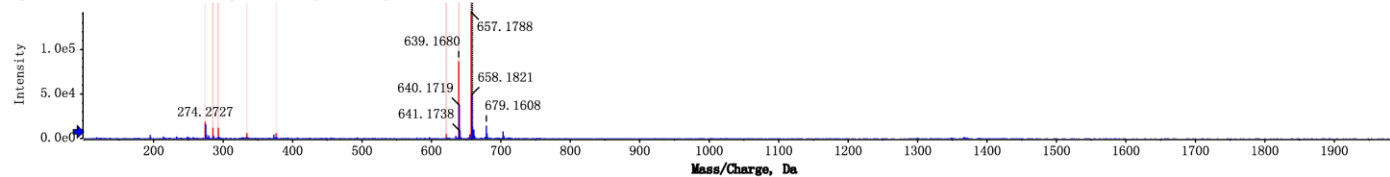

Spectrum from JST-NEG.wiff (sample 1) - Sample003, Experiment 9, -TOF MS<sup>2</sup> (50 - 2000) from 8.838 min  
Precursor: 657.2 Da, CE: 50.0

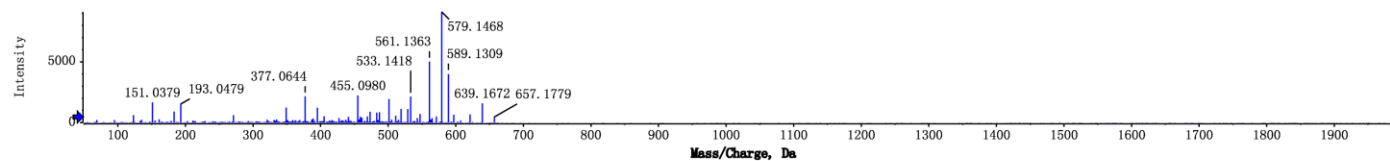

XIC from JST-NEG.wiff (sample 1) - Sample003, Experiment 1, -TOF MS (100 - 2000): 656.1663 Da

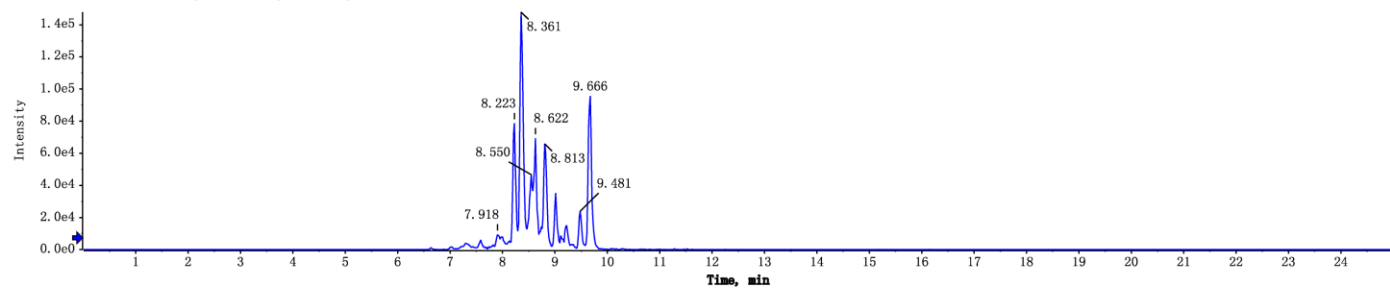

D

Spectrum from JST-NEG.wiff (sample 1) - Sample003, Experiment 1, -TOF MS (100 - 2000) from 9.659 min

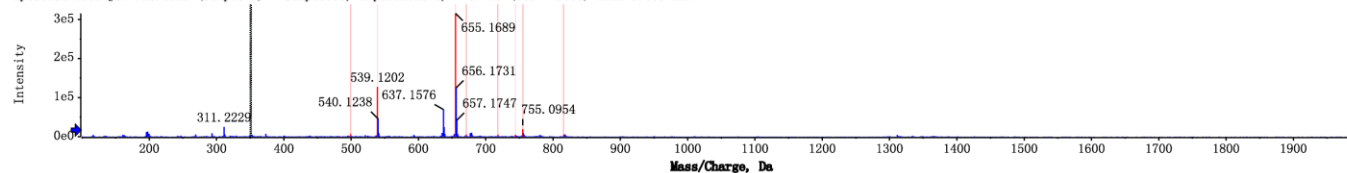

Spectrum from JST-NEG.wiff (sample 1) - Sample003, Experiment 3, -TOF MS<sup>2</sup> (50 - 2000) from 9.662 min  
Precursor: 539.1 Da

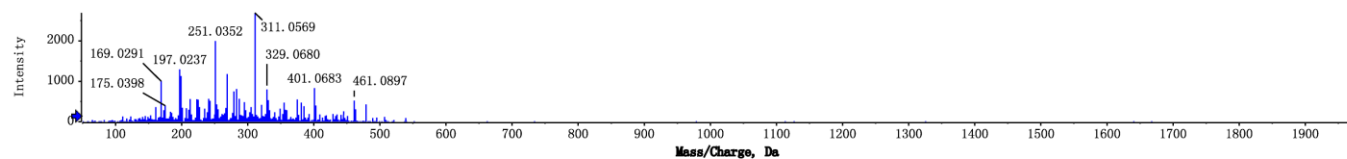

XIC from JST-NEG.wiff (sample 1) - Sample003, Experiment 1, -TOF MS (100 - 2000): 540.2259 Da

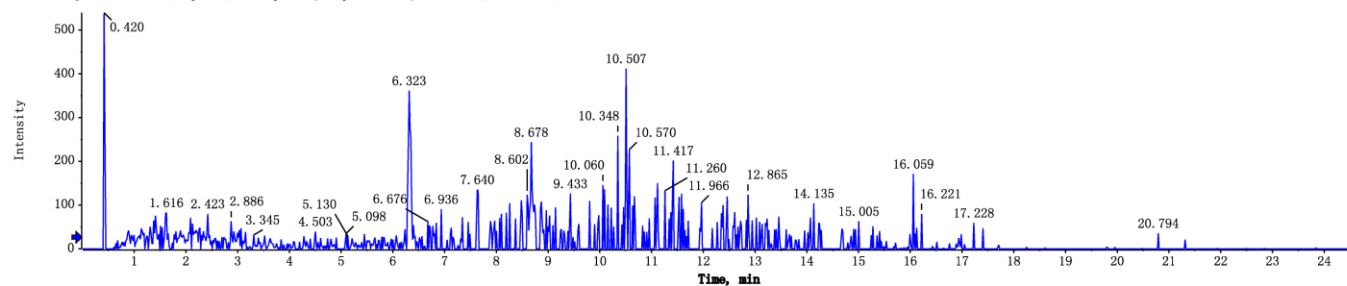

# E

Spectrum from JST-NEG.wiff (sample 1) - Sample003, Experiment 1, -TOF MS (100 - 2000) from 10.012 min

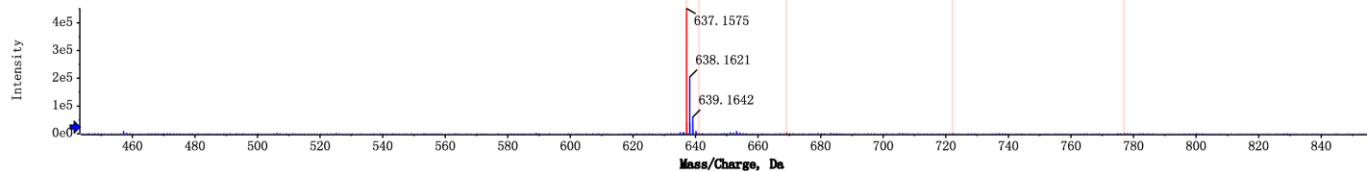

Spectrum from JST-NEG.wiff (sample 1) - Sample003, Experiment 5, -TOF MS<sup>2</sup> (50 - 2000) from 10.018 min  
Precursor: 637.2 Da

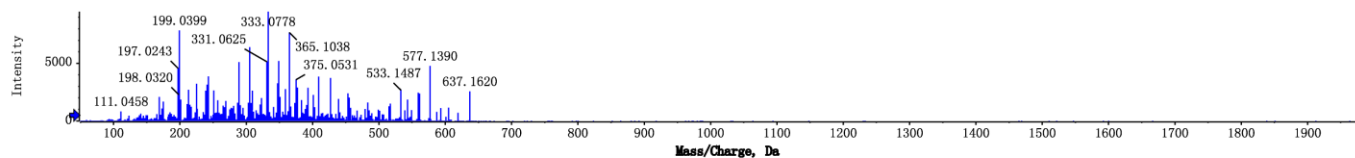

XIC from JST-NEG.wiff (sample 1) - Sample003, Experiment 1, -TOF MS (100 - 2000): 637.3535 Da

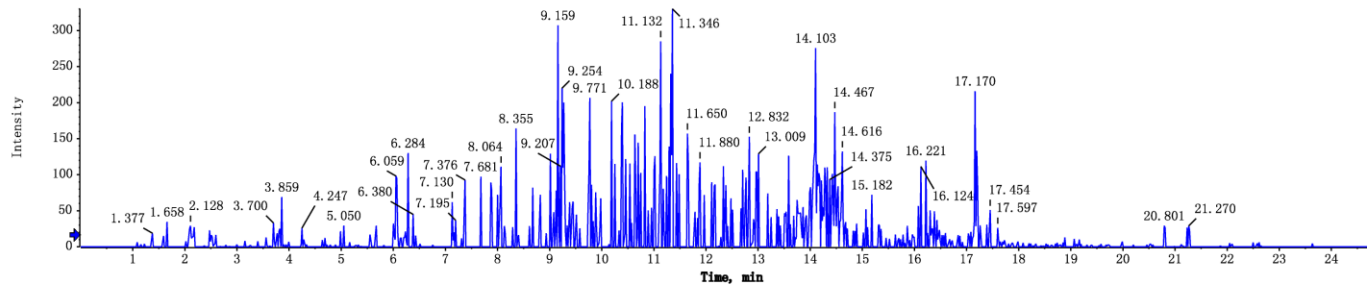

Figure S1. the characteristic ion mass spectrometries of arabelline (A), (-)-epicatechin gallate(B), 2'-O-p-hydroxybenzoyl-6'-O-trans-caffeoylgardoside (C), yunnaneic acid D (D), 4'-O-methylgallocatechin-(4->8)-4'-O-methylepigallocatechin (E)
